# Supplementary material for: Electronic Cigarette Smoke Impairs Normal Mesenchymal Stem Cell Differentiation
Source: PubMed Central journal article supplement (PMC5660168; doi:10.1038/s41598-017-14634-z), 2017-10-27

Electronic Cigarette Smoke Impairs Normal Mesenchymal Stem Cell Differentiation.

A. Shaito, J. Saliba, A. Husari, M. El-Harakeh, H. Chhour, Y. Hashem, A. Shihadeh and M. El-Sabban.

Supplementary Figure S1.

**Supplementary Figure S1.**  
**Original Full Length Blots.**

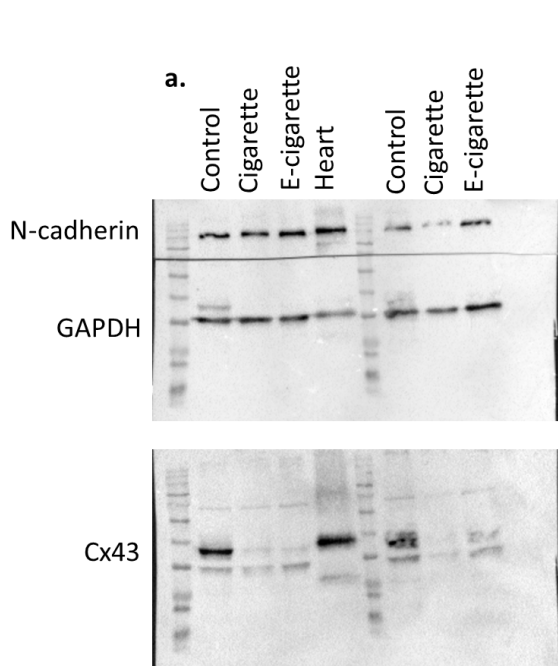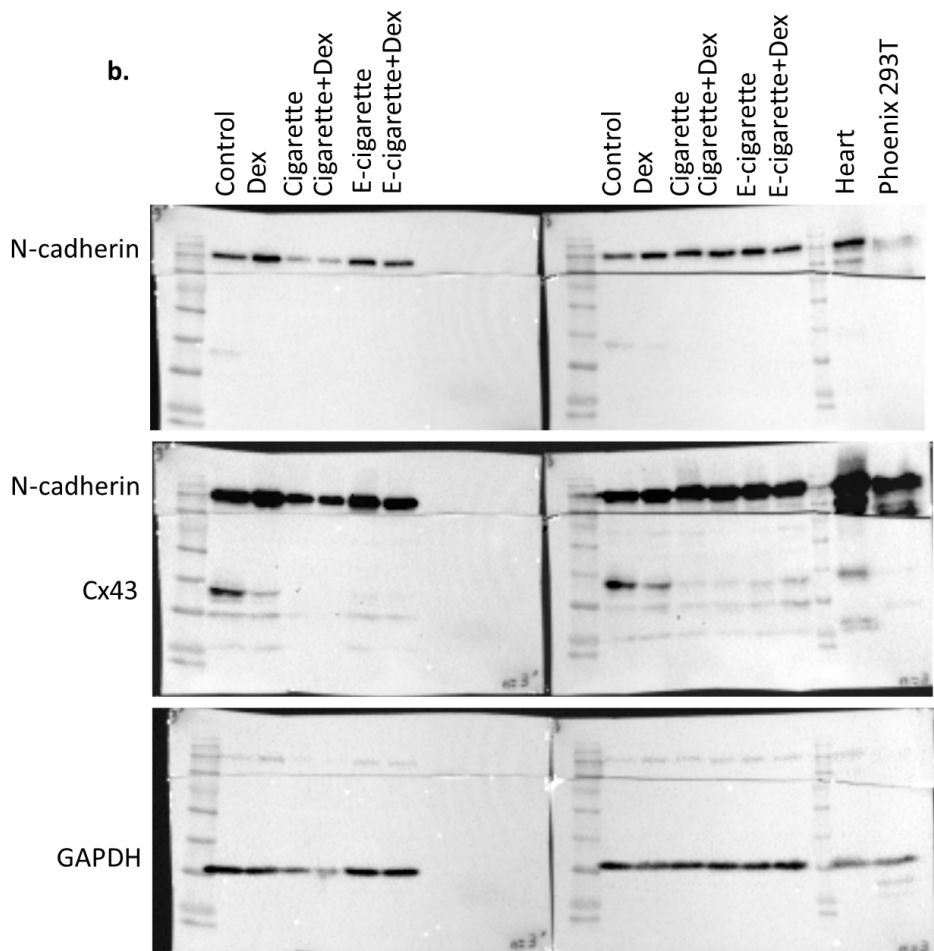

Supplement: 41598_2017_14634_MOESM1_ESM.pdf [file 41598_2017_14634_MOESM1_ESM.pdf]
